# Supplementary material
Source: PubMed Central journal article supplement (PMC6644250)
Supplement: ao6b00502_si_001.pdf [file ao6b00502_si_001.pdf]

Supporting Information

# AUXILIARY BIOMEMBRANES AS A DIRECTIONAL DELIVERY SYSTEM TO CONTROL BIOLOGICAL EVENTS IN CELL-LADEN TISSUE ENGINEERING SCAFFOLDS

*Helena Knopf-Marques<sup>%,&#</sup>, Julien Barthès<sup>%,δ#</sup>, Lucie Wolfova<sup>θ</sup>, Bérengère Vidal<sup>δ</sup>,  
Geraldine Koenig<sup>1</sup>, Jalal Bacharouche<sup>‡</sup>, Grégory Francius<sup>‡</sup>, Helle Sadam<sup>¥</sup>, Urmas Liivas<sup>¥</sup>,  
Philippe Lavalley<sup>1,2\*</sup>, Nihal Engin Vrana<sup>%,δ\*</sup>*

<sup>%</sup>INSERM UMR 1121, 11 rue Humann, 67085 Strasbourg, France

<sup>&</sup> Faculté de Chirurgie Dentaire, Université de Strasbourg, 3 rue Sainte Elisabeth, 67000  
Strasbourg, France

<sup>θ</sup>PROTIP MEDICAL, 8 Place de l'Hôpital, 67000 Strasbourg, France

<sup>θ</sup>Contipro Biotech S. R. O, Dolni Dobrouc 401 561 02 Dolni Dobrouc, Czech Republic

<sup>‡</sup>Laboratoire de Chimie Physique et Microbiologie pour l'Environnement CNRS UMR7564,  
405 rue de Vandoeuvre, 54600 Villers-les-Nancy, France

<sup>¥</sup>PROTOBIOS LLC, Tallinn, Estonia

<sup>#</sup> These authors contributed equally

\*Corresponding Authors:

e.vrana@protipmedical.com and philippe.lavalle@inserm.fr

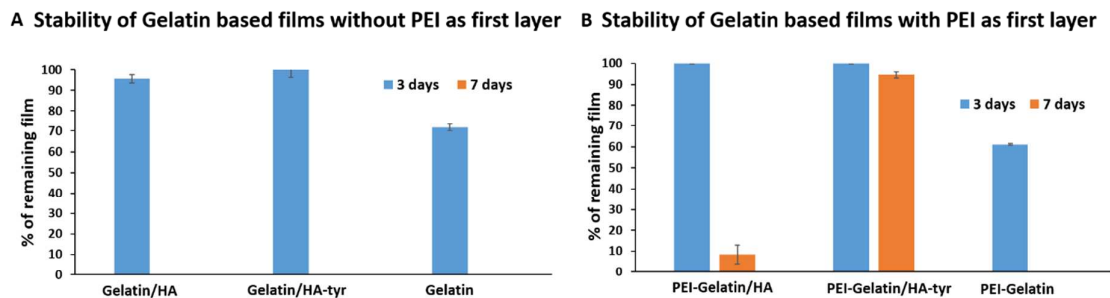

Figure S1. Stability of gelatin, gelatin/unmodified HA, gelatin/HA-tyr films without (A) and with (B) PEI as first layer in PBS at 37°C after 3 and 7 days. The analysis was performed on three different samples for each condition.

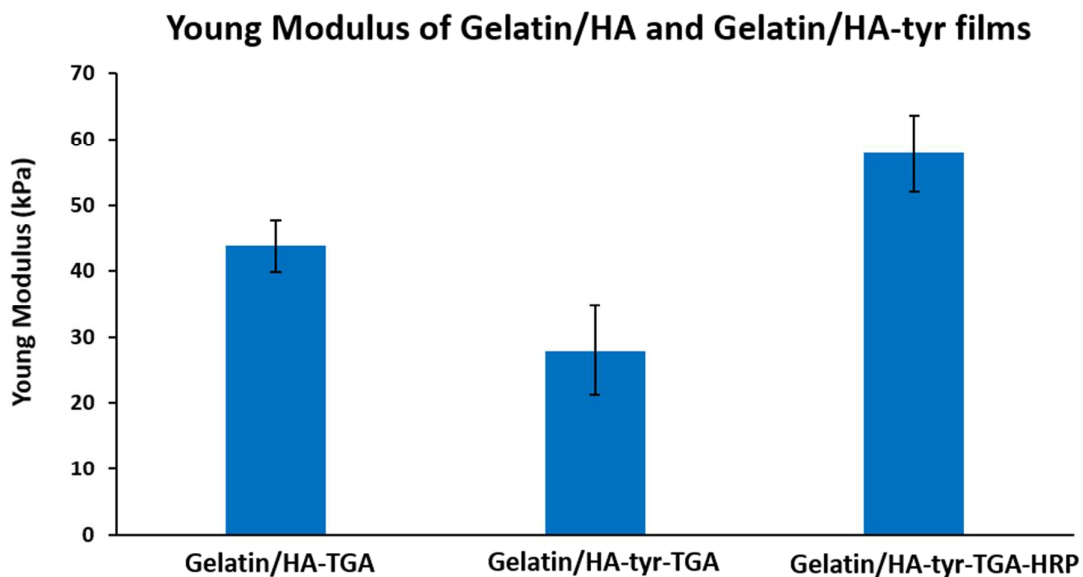

Figure S2. Young modulus determination of gelatin/HA and gelatin/HA-tyr (with and without TGA crosslinking step) films by AFM nanoindentation experiment in dry condition. The analysis was performed on three different samples for each condition.

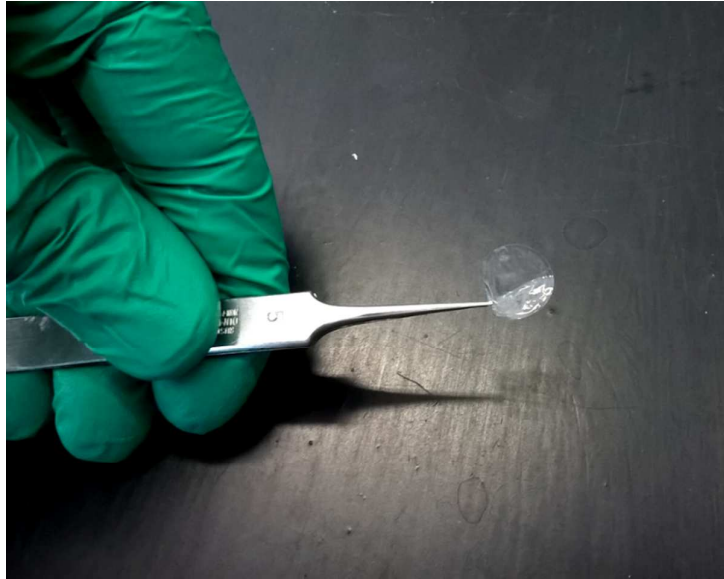

Figure S3. Picture of self-standing gelatin/HA-tyr membrane.

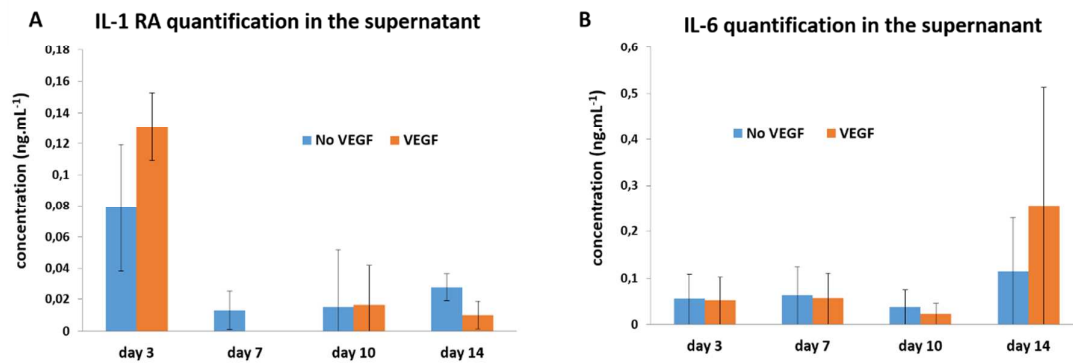

Figure S4. Cytokines quantification with Elisa test in the supernatant for encapsulated HUVECs in hydrogel with and without VEGF release from the gelatin/HA-tyr film until day 14. A) IL-8 quantification and B) IL-6 quantification. The quantification was performed on three different samples for each condition.

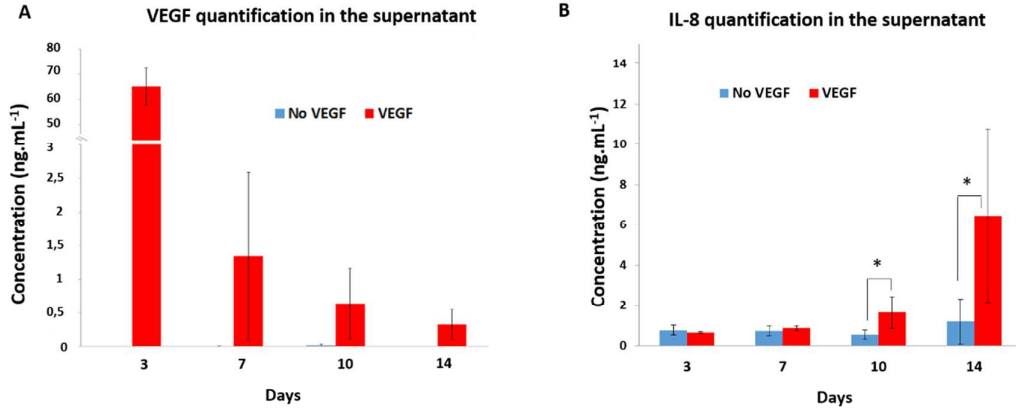

Figure S5. Cytokines quantification with Elisa test in the supernatant for encapsulated HUVECs in hydrogel with and without VEGF release from the film until day 14. A) VEGF quantification. VEGF release kept high level of VEGF in the microenvironment. B) IL-8 quantification. VEGF release significantly increases IL-8 secretion at day 10 and 14. The quantification was performed on three different samples for each condition ( $p \leq 0,05$ ).

### M2 Markers

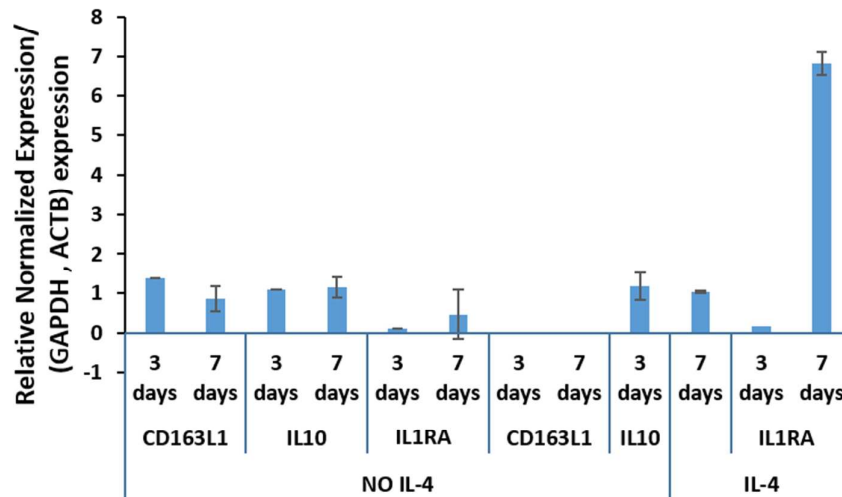

Figure S6. Results of Real-Time PCR analysis of M2 markers for 3D encapsulated THP-1 cells without or with IL-4 release. The M2 markers genes are: CD163L1, IL-10, IL1-RA.

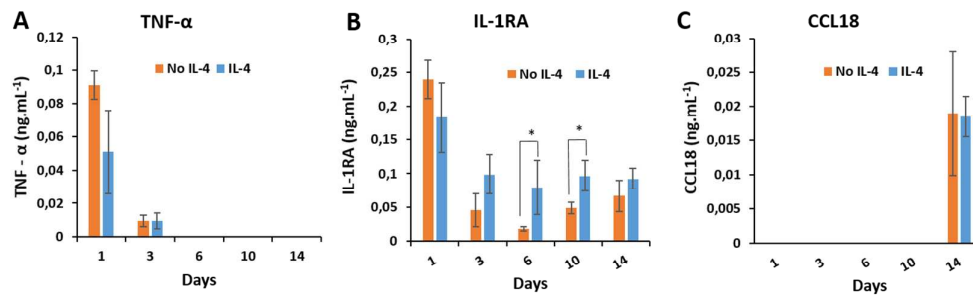

*Figure S7. Cytokines quantification with Elisa test in the supernatant for encapsulated THP-1 in hydrogel with and without IL-4 release from the film until day 21. A) TNF- $\alpha$  quantification. IL-4 release significantly decreases initial TNF- $\alpha$  secretion. B) IL-1 RA quantification. IL-4 release significantly increases IL1-RA secretion at day 6 and 10. C) CCL18 quantification. The quantification was performed with 3 different samples for each condition ( $p \leq 0,05$ ).*
